# Supplementary material
Source: publisher figshare collection journal article supplement (https://acs.figshare.com/ndownloader/files/3799246)
Supplement: Supplementary file 1 [file 3799246]

 
data_ga64pas 
 
_audit_creation_method            SHELXL-97 
_audit_update_record 
; 
2007-01-30   text and data added, srw 
; 
 
_chemical_name_systematic 
; 
? 
; 
 
_chemical_name_common            ? 
_chemical_melting_point          ? 
_chemical_formula_moiety         'C44 H46 O P2 Pd Si' 
_chemical_formula_sum 
 'C44 H46 O P2 Pd Si' 
_chemical_formula_structural     ? 
_chemical_formula_weight          787.24 
 
_chemical_absolute_configuration . 
_chemical_formula_analytical     ? 
_chemical_compound_source        ? 
 
loop_ 
 _atom_type_symbol 
 _atom_type_description 
 _atom_type_scat_dispersion_real 
 _atom_type_scat_dispersion_imag 
 _atom_type_scat_source 
 'C'  'C'   0.0033   0.0016 
 'International Tables Vol C Tables 4.2.6.8 and 6.1.1.4' 
 'H'  'H'   0.0000   0.0000 
 'International Tables Vol C Tables 4.2.6.8 and 6.1.1.4' 
 'O'  'O'   0.0106   0.0060 
 'International Tables Vol C Tables 4.2.6.8 and 6.1.1.4' 
 'Si'  'Si'   0.0817   0.0704 
 'International Tables Vol C Tables 4.2.6.8 and 6.1.1.4' 
 'P'  'P'   0.1023   0.0942 
 'International Tables Vol C Tables 4.2.6.8 and 6.1.1.4' 
 'Pd'  'Pd'  -0.9988   1.0072 
 'International Tables Vol C Tables 4.2.6.8 and 6.1.1.4' 
 
_symmetry_cell_setting           'Orthorhombic' 
_symmetry_space_group_name_H-M   'P b c a ' 
_symmetry_space_group_name_Hall  '-P 2ac 2ab ' 
 
loop_ 
 _symmetry_equiv_pos_as_xyz 
 'x, y, z' 
 '-x+1/2, -y, z+1/2' 
 '-x, y+1/2, -z+1/2' 
 'x+1/2, -y+1/2, -z' 
 '-x, -y, -z' 
 'x-1/2, y, -z-1/2' 
 'x, -y-1/2, z-1/2' 
 '-x-1/2, y-1/2, z' 
 
_cell_length_a                    16.0574(5) 
_cell_length_b                    19.2846(5) 
_cell_length_c                    25.5466(7) 
_cell_angle_alpha                 90.00 
_cell_angle_beta                  90.00 
_cell_angle_gamma                 90.00 
_cell_volume                      7910.8(4) 
_cell_formula_units_Z             8 
_cell_measurement_temperature     193(2) 
_cell_measurement_reflns_used    4488 
_cell_measurement_theta_min        2.26 
_cell_measurement_theta_max       19.37 
_exptl_crystal_description       'tabular' 
_exptl_crystal_colour            'colourless' 
_exptl_crystal_size_max          0.30 
_exptl_crystal_size_mid          0.06 
_exptl_crystal_size_min          0.02 
_exptl_crystal_density_meas      ? 
_exptl_crystal_density_diffrn     1.322 
_exptl_crystal_density_method    'not measured' 
_exptl_crystal_F_000              3264 
_exptl_crystal_id                ga64pas 
 
_exptl_crystal_preparation 
; 
The data crystal was mounted using oil (Parantone-N, Exxon) to a 
0.3 mm cryo-loop (Hampton Research) with the (1 -5 -1) scattering 
planes roughly normal to the spindle axis. 
; 
_exptl_absorpt_coefficient_mu     0.613 
_exptl_absorpt_correction_type   'integration' 
_exptl_absorpt_correction_T_min  0.8703 
_exptl_absorpt_correction_T_max  0.9879 
_exptl_absorpt_process_details   'SHELXTL/XPREP (Bruker, 2001)' 
 
_exptl_special_details 
; 
One distinct cell was identified using APEX2 (Bruker, 2004).  Four 
frame series were integrated and filtered for statistical outliers 
using SAINT (Bruker, 2001) then corrected for absorption by 
integration using SHELXTL/XPREP (Bruker, 2001) before using 
SAINT/SADABS (Bruker, 2001) to sort, merge, and scale the combined 
data.  No decay correction was applied. 
; 
 
_diffrn_ambient_temperature       193(2) 
_diffrn_radiation_wavelength      0.71073 
_diffrn_radiation_wavelength_id  ga64pas 
_diffrn_radiation_type           'MoK\a' 
_diffrn_radiation_source         'fine-focus sealed tube' 
_diffrn_radiation_monochromator  'graphite' 
_diffrn_measurement_device_type   ? 
_diffrn_measurement_device       'Bruker Kappa/ApexII CCD' 
_diffrn_measurement_method       'profile data from \f and \w scans' 
_diffrn_detector_area_resol_mean  ? 
_diffrn_standards_number         ? 
_diffrn_standards_interval_count  ? 
_diffrn_standards_interval_time  ? 
 
_diffrn_standards_decay_%        ? 
_diffrn_reflns_number            100321 
 
_diffrn_reflns_av_R_equivalents   0.1659 
_diffrn_reflns_av_sigmaI/netI     0.0897 
_diffrn_reflns_limit_h_min        -19 
_diffrn_reflns_limit_h_max        19 
_diffrn_reflns_limit_k_min        -23 
_diffrn_reflns_limit_k_max        23 
_diffrn_reflns_limit_l_min        -31 
_diffrn_reflns_limit_l_max        31 
_diffrn_reflns_theta_min          1.83 
_diffrn_reflns_theta_max          25.71 
_reflns_number_total              7526 
_reflns_number_gt                 4225 
_reflns_threshold_expression      >2sigma(I) 
 
_computing_data_collection       'APEX2 V1.0-27 (Bruker, 2004)' 
 
_computing_cell_refinement       'SAINT V6.22 (Bruker, 2001)' 
_computing_data_reduction        'SAINT V6.22 (Bruker, 2001)' 
_computing_structure_solution    'SHELXTL V6.12 (Bruker, 2001)' 
_computing_structure_refinement  'SHELXTL V6.12 (Bruker, 2001)' 
_computing_molecular_graphics    'SHELXTL V6.12 (Bruker, 2001)' 
_computing_publication_material  'XCIF (Bruker, 2001)' 
 
_refine_special_details 
; 
Structure was phased by direct methods.  Systematic conditions 
suggested the unambiguous space group.  The space group choice was 
confirmed by successful convergence of the full-matrix least-squares 
refinement on F^2^.  The highest peaks in the final difference 
Fourier map were in the vicinity of atoms C8, Pd1, P1, and P2; the 
final map had no other significant features.  A final analysis of 
variance between observed and calculated structure factors showed 
no dependence on amplitude or resolution. For the data crystal, 
mean I/\s(I) was less than 1 for reflections beyond 1\%A 
resolution.  Reflections between 1 and 0.8\%A resolution were used 
for least-squares refinement to improve the data-to-variable ratio 
at the expense of agreement factors. 
; 
 
_refine_ls_structure_factor_coef  Fsqd 
_refine_ls_matrix_type            full 
_refine_ls_weighting_scheme       calc 
_refine_ls_weighting_details 
 'calc w=1/[\s^2^(Fo^2^)+(0.0224P)^2^+9.5255P] where P=(Fo^2^+2Fc^2^)/3' 
_atom_sites_solution_primary      direct 
_atom_sites_solution_secondary    difmap 
_atom_sites_solution_hydrogens    geom 
_refine_ls_hydrogen_treatment    noref 
_refine_ls_extinction_method      none 
_refine_ls_extinction_coef        ? 
_refine_ls_number_reflns          7526 
_refine_ls_number_parameters      445 
_refine_ls_number_restraints      0 
_refine_ls_R_factor_all           0.1202 
_refine_ls_R_factor_gt            0.0428 
_refine_ls_wR_factor_ref          0.0903 
_refine_ls_wR_factor_gt           0.0683 
_refine_ls_goodness_of_fit_ref    0.995 
_refine_ls_restrained_S_all       0.995 
_refine_ls_shift/su_max           0.002 
_refine_ls_shift/su_mean          0.000 
 
loop_ 
 _atom_site_label 
 _atom_site_type_symbol 
 _atom_site_fract_x 
 _atom_site_fract_y 
 _atom_site_fract_z 
 _atom_site_U_iso_or_equiv 
 _atom_site_adp_type 
 _atom_site_occupancy 
 _atom_site_symmetry_multiplicity 
 _atom_site_calc_flag 
 _atom_site_refinement_flags 
 _atom_site_disorder_assembly 
 _atom_site_disorder_group 
C1 C 0.1407(3) 0.2575(2) 0.78070(17) 0.0326(11) Uani 1 1 d . . . 
H1A H 0.0952 0.2228 0.7797 0.039 Uiso 1 1 calc R . . 
H1B H 0.1394 0.2798 0.8156 0.039 Uiso 1 1 calc R . . 
C2 C 0.1235(3) 0.3125(2) 0.73937(18) 0.0366(12) Uani 1 1 d . . . 
H2A H 0.0815 0.3452 0.7533 0.044 Uiso 1 1 calc R . . 
H2B H 0.1754 0.3390 0.7331 0.044 Uiso 1 1 calc R . . 
C3 C 0.0926(3) 0.2845(2) 0.68737(18) 0.0396(12) Uani 1 1 d . . . 
H3A H 0.0749 0.3242 0.6654 0.048 Uiso 1 1 calc R . . 
H3B H 0.0426 0.2558 0.6940 0.048 Uiso 1 1 calc R . . 
C4 C 0.2395(3) 0.1533(2) 0.82972(16) 0.0311(10) Uani 1 1 d . . . 
C5 C 0.1659(3) 0.1218(2) 0.84525(19) 0.0411(13) Uani 1 1 d . . . 
H5 H 0.1154 0.1337 0.8281 0.049 Uiso 1 1 calc R . . 
C6 C 0.1646(3) 0.0734(2) 0.8852(2) 0.0460(14) Uani 1 1 d . . . 
H6 H 0.1136 0.0524 0.8955 0.055 Uiso 1 1 calc R . . 
C7 C 0.2379(4) 0.0559(2) 0.91002(18) 0.0476(13) Uani 1 1 d . . . 
H7 H 0.2376 0.0229 0.9376 0.057 Uiso 1 1 calc R . . 
C8 C 0.3107(3) 0.0860(3) 0.89500(19) 0.0452(14) Uani 1 1 d . . . 
H8 H 0.3609 0.0735 0.9122 0.054 Uiso 1 1 calc R . . 
C9 C 0.3129(3) 0.1348(2) 0.85492(18) 0.0368(12) Uani 1 1 d . . . 
H9 H 0.3643 0.1553 0.8448 0.044 Uiso 1 1 calc R . . 
C10 C 0.3133(3) 0.2810(2) 0.78966(18) 0.0313(11) Uani 1 1 d . . . 
C11 C 0.3210(3) 0.3078(2) 0.8396(2) 0.0469(14) Uani 1 1 d . . . 
H11 H 0.2924 0.2864 0.8678 0.056 Uiso 1 1 calc R . . 
C12 C 0.3701(3) 0.3657(3) 0.8490(2) 0.0569(16) Uani 1 1 d . . . 
H12 H 0.3756 0.3829 0.8836 0.068 Uiso 1 1 calc R . . 
C13 C 0.4107(3) 0.3982(2) 0.8088(3) 0.0545(15) Uani 1 1 d . . . 
H13 H 0.4431 0.4385 0.8153 0.065 Uiso 1 1 calc R . . 
C14 C 0.4044(3) 0.3721(2) 0.7591(2) 0.0461(14) Uani 1 1 d . . . 
H14 H 0.4330 0.3940 0.7311 0.055 Uiso 1 1 calc R . . 
C15 C 0.3561(3) 0.3136(2) 0.7496(2) 0.0345(12) Uani 1 1 d . . . 
H15 H 0.3524 0.2958 0.7150 0.041 Uiso 1 1 calc R . . 
C16 C 0.1008(3) 0.1847(3) 0.60462(19) 0.0420(13) Uani 1 1 d . . . 
C17 C 0.0420(3) 0.2188(3) 0.5746(2) 0.0615(17) Uani 1 1 d . . . 
H17 H 0.0344 0.2673 0.5785 0.074 Uiso 1 1 calc R . . 
C18 C -0.0056(4) 0.1826(5) 0.5391(2) 0.084(2) Uani 1 1 d . . . 
H18 H -0.0459 0.2063 0.5186 0.100 Uiso 1 1 calc R . . 
C19 C 0.0047(4) 0.1128(5) 0.5332(3) 0.086(3) Uani 1 1 d . . . 
H19 H -0.0276 0.0883 0.5082 0.103 Uiso 1 1 calc R . . 
C20 C 0.0617(4) 0.0778(4) 0.5634(3) 0.077(2) Uani 1 1 d . . . 
H20 H 0.0681 0.0291 0.5598 0.092 Uiso 1 1 calc R . . 
C21 C 0.1101(3) 0.1144(3) 0.5994(2) 0.0543(15) Uani 1 1 d . . . 
H21 H 0.1496 0.0904 0.6204 0.065 Uiso 1 1 calc R . . 
C22 C 0.2183(3) 0.2959(2) 0.60703(18) 0.0355(12) Uani 1 1 d . . . 
C23 C 0.2436(3) 0.2768(3) 0.55785(19) 0.0496(14) Uani 1 1 d . . . 
H23 H 0.2345 0.2306 0.5462 0.060 Uiso 1 1 calc R . . 
C24 C 0.2822(3) 0.3240(3) 0.5250(2) 0.0628(16) Uani 1 1 d . . . 
H24 H 0.2983 0.3104 0.4907 0.075 Uiso 1 1 calc R . . 
C25 C 0.2973(3) 0.3908(3) 0.5420(2) 0.0551(15) Uani 1 1 d . . . 
H25 H 0.3238 0.4232 0.5195 0.066 Uiso 1 1 calc R . . 
C26 C 0.2741(3) 0.4102(3) 0.5912(2) 0.0567(15) Uani 1 1 d . . . 
H26 H 0.2851 0.4559 0.6032 0.068 Uiso 1 1 calc R . . 
C27 C 0.2345(3) 0.3630(2) 0.6236(2) 0.0491(13) Uani 1 1 d . . . 
H27 H 0.2181 0.3769 0.6578 0.059 Uiso 1 1 calc R . . 
C28 C 0.4571(3) 0.1616(3) 0.58283(19) 0.0466(13) Uani 1 1 d . . . 
H28 H 0.5047 0.1482 0.5632 0.056 Uiso 1 1 calc R . . 
C29 C 0.4556(3) 0.2252(3) 0.60159(19) 0.0451(13) Uani 1 1 d . . . 
H29 H 0.4078 0.2374 0.6214 0.054 Uiso 1 1 calc R . . 
C30 C 0.5197(3) 0.2801(3) 0.59555(18) 0.0396(12) Uani 1 1 d . . . 
C31 C 0.5961(3) 0.2685(3) 0.57158(18) 0.0459(14) Uani 1 1 d . . . 
H31 H 0.6089 0.2237 0.5585 0.055 Uiso 1 1 calc R . . 
C32 C 0.6535(3) 0.3209(3) 0.5665(2) 0.0541(15) Uani 1 1 d . . . 
H32 H 0.7054 0.3118 0.5500 0.065 Uiso 1 1 calc R . . 
C33 C 0.6365(4) 0.3863(3) 0.5848(2) 0.0657(17) Uani 1 1 d . . . 
H33 H 0.6765 0.4224 0.5815 0.079 Uiso 1 1 calc R . . 
C34 C 0.5608(4) 0.3989(3) 0.6081(2) 0.0634(17) Uani 1 1 d . . . 
H34 H 0.5483 0.4440 0.6207 0.076 Uiso 1 1 calc R . . 
C35 C 0.5024(3) 0.3461(3) 0.6134(2) 0.0524(14) Uani 1 1 d . . . 
H35 H 0.4502 0.3556 0.6294 0.063 Uiso 1 1 calc R . . 
C36 C 0.3368(3) 0.0728(3) 0.52426(19) 0.0579(16) Uani 1 1 d . . . 
H36A H 0.2891 0.0413 0.5264 0.087 Uiso 1 1 calc R . . 
H36B H 0.3823 0.0501 0.5052 0.087 Uiso 1 1 calc R . . 
H36C H 0.3204 0.1151 0.5058 0.087 Uiso 1 1 calc R . . 
C37 C 0.4263(3) 0.0172(2) 0.6187(2) 0.0500(14) Uani 1 1 d . . . 
H37A H 0.4546 0.0295 0.6514 0.075 Uiso 1 1 calc R . . 
H37B H 0.4672 0.0003 0.5933 0.075 Uiso 1 1 calc R . . 
H37C H 0.3851 -0.0192 0.6256 0.075 Uiso 1 1 calc R . . 
C38 C 0.3585(3) 0.1118(2) 0.73208(16) 0.0259(10) Uani 1 1 d . . . 
C39 C 0.4371(3) 0.1398(2) 0.74066(17) 0.0325(11) Uani 1 1 d . . . 
H39 H 0.4481 0.1859 0.7294 0.039 Uiso 1 1 calc R . . 
C40 C 0.5005(3) 0.1024(2) 0.76541(18) 0.0374(12) Uani 1 1 d . . . 
H40 H 0.5539 0.1225 0.7706 0.045 Uiso 1 1 calc R . . 
C41 C 0.4842(3) 0.0360(2) 0.78205(19) 0.0432(13) Uani 1 1 d . . . 
H41 H 0.5262 0.0100 0.7994 0.052 Uiso 1 1 calc R . . 
C42 C 0.4068(3) 0.0073(2) 0.77353(18) 0.0391(12) Uani 1 1 d . . . 
H42 H 0.3966 -0.0388 0.7849 0.047 Uiso 1 1 calc R . . 
C43 C 0.3435(3) 0.0435(2) 0.74893(18) 0.0337(11) Uani 1 1 d . . . 
C44 C 0.2598(3) 0.0104(2) 0.74013(18) 0.0444(13) Uani 1 1 d . . . 
H44A H 0.2594 -0.0361 0.7555 0.067 Uiso 1 1 calc R . . 
H44B H 0.2489 0.0071 0.7025 0.067 Uiso 1 1 calc R . . 
H44C H 0.2165 0.0388 0.7567 0.067 Uiso 1 1 calc R . . 
O1 O 0.29639(18) 0.12213(15) 0.62498(11) 0.0380(8) Uani 1 1 d . . . 
P1 P 0.24029(7) 0.21200(5) 0.77345(4) 0.0277(3) Uani 1 1 d . . . 
P2 P 0.16736(7) 0.23259(6) 0.64987(5) 0.0326(3) Uani 1 1 d . . . 
Pd1 Pd 0.266896(19) 0.166846(16) 0.695369(13) 0.02598(9) Uani 1 1 d . . . 
Si1 Si 0.37261(8) 0.09535(7) 0.59173(5) 0.0370(3) Uani 1 1 d . . . 
 
loop_ 
 _atom_site_aniso_label 
 _atom_site_aniso_U_11 
 _atom_site_aniso_U_22 
 _atom_site_aniso_U_33 
 _atom_site_aniso_U_23 
 _atom_site_aniso_U_13 
 _atom_site_aniso_U_12 
C1 0.031(3) 0.037(3) 0.030(3) -0.005(2) 0.004(2) -0.001(2) 
C2 0.031(3) 0.035(3) 0.044(3) -0.001(2) 0.008(2) 0.006(2) 
C3 0.027(3) 0.044(3) 0.048(3) 0.010(3) -0.001(2) 0.004(2) 
C4 0.033(3) 0.031(2) 0.029(2) -0.0044(19) 0.003(2) 0.001(2) 
C5 0.034(3) 0.044(3) 0.045(3) 0.006(3) -0.004(3) -0.008(2) 
C6 0.046(4) 0.043(3) 0.048(3) 0.009(3) 0.001(3) -0.011(3) 
C7 0.065(4) 0.045(3) 0.033(3) 0.007(2) 0.009(3) 0.002(3) 
C8 0.041(4) 0.059(3) 0.035(3) 0.004(3) -0.006(3) 0.008(3) 
C9 0.038(3) 0.042(3) 0.030(3) 0.000(2) 0.000(2) 0.002(2) 
C10 0.023(3) 0.029(2) 0.042(3) -0.004(2) -0.001(2) -0.001(2) 
C11 0.041(3) 0.050(3) 0.050(4) -0.009(3) 0.007(3) -0.006(3) 
C12 0.051(4) 0.056(4) 0.064(4) -0.032(3) -0.007(3) -0.009(3) 
C13 0.038(3) 0.035(3) 0.090(5) -0.019(3) -0.009(4) -0.005(2) 
C14 0.029(3) 0.034(3) 0.076(4) 0.007(3) 0.003(3) -0.006(2) 
C15 0.025(3) 0.029(3) 0.049(3) 0.003(2) -0.002(2) 0.001(2) 
C16 0.032(3) 0.062(4) 0.032(3) 0.009(3) -0.001(2) -0.010(2) 
C17 0.048(4) 0.092(5) 0.044(4) 0.017(3) -0.013(3) -0.014(3) 
C18 0.048(4) 0.159(8) 0.044(4) 0.024(5) -0.015(3) -0.030(5) 
C19 0.043(4) 0.162(8) 0.051(4) -0.037(5) 0.002(3) -0.049(5) 
C20 0.041(4) 0.113(6) 0.076(5) -0.047(4) 0.006(4) -0.018(4) 
C21 0.035(3) 0.074(4) 0.054(4) -0.016(3) -0.003(3) -0.005(3) 
C22 0.025(3) 0.041(3) 0.040(3) 0.013(2) 0.003(2) 0.005(2) 
C23 0.044(3) 0.059(3) 0.046(3) 0.005(3) 0.014(3) -0.003(3) 
C24 0.057(4) 0.082(5) 0.049(4) 0.010(3) 0.021(3) -0.010(3) 
C25 0.045(4) 0.067(4) 0.053(4) 0.028(3) 0.009(3) 0.004(3) 
C26 0.060(4) 0.047(3) 0.063(4) 0.017(3) 0.005(3) -0.007(3) 
C27 0.057(4) 0.046(3) 0.044(3) 0.010(3) 0.013(3) -0.004(3) 
C28 0.041(3) 0.050(3) 0.048(3) 0.003(3) 0.001(2) 0.006(3) 
C29 0.044(3) 0.053(3) 0.038(3) 0.004(3) 0.003(3) 0.004(3) 
C30 0.047(3) 0.046(3) 0.026(3) 0.002(2) -0.010(2) -0.008(3) 
C31 0.049(4) 0.052(3) 0.037(3) 0.003(3) -0.010(3) -0.006(3) 
C32 0.049(4) 0.064(4) 0.049(4) 0.001(3) -0.003(3) -0.017(3) 
C33 0.073(5) 0.059(4) 0.065(4) 0.009(3) -0.013(4) -0.029(4) 
C34 0.091(5) 0.046(4) 0.054(4) -0.008(3) -0.013(4) -0.009(4) 
C35 0.059(4) 0.055(4) 0.043(3) -0.005(3) -0.004(3) 0.003(3) 
C36 0.061(4) 0.069(4) 0.044(3) -0.009(3) -0.001(3) 0.001(3) 
C37 0.042(3) 0.046(3) 0.063(4) -0.007(3) 0.001(3) 0.006(3) 
C38 0.026(3) 0.028(2) 0.024(3) -0.002(2) 0.001(2) -0.001(2) 
C39 0.031(3) 0.032(2) 0.035(3) 0.003(2) 0.003(2) 0.002(2) 
C40 0.027(3) 0.038(3) 0.047(3) 0.000(2) -0.001(2) 0.003(2) 
C41 0.039(3) 0.039(3) 0.052(3) 0.000(2) -0.010(3) 0.012(2) 
C42 0.051(3) 0.021(2) 0.045(3) 0.000(2) 0.000(3) 0.008(2) 
C43 0.038(3) 0.030(3) 0.034(3) -0.006(2) 0.004(2) 0.000(2) 
C44 0.046(3) 0.031(2) 0.056(3) -0.001(2) -0.005(3) -0.010(2) 
O1 0.0345(19) 0.0467(19) 0.0328(19) -0.0068(15) -0.0034(15) 0.0045(15) 
P1 0.0235(7) 0.0277(6) 0.0317(7) -0.0001(5) 0.0000(6) -0.0025(5) 
P2 0.0267(7) 0.0366(7) 0.0346(7) 0.0057(6) 0.0005(6) 0.0015(5) 
Pd1 0.02360(16) 0.02581(15) 0.02854(17) 0.00053(17) -0.00147(17) -0.00062(16) 
Si1 0.0332(8) 0.0405(8) 0.0374(8) -0.0049(7) -0.0010(7) -0.0009(6) 
 
_geom_special_details 
; 
 All esds (except the esd in the dihedral angle between two l.s. planes) 
 are estimated using the full covariance matrix.  The cell esds are taken 
 into account individually in the estimation of esds in distances, angles 
 and torsion angles; correlations between esds in cell parameters are only 
 used when they are defined by crystal symmetry.  An approximate (isotropic) 
 treatment of cell esds is used for estimating esds involving l.s. planes. 
; 
 
loop_ 
 _geom_bond_atom_site_label_1 
 _geom_bond_atom_site_label_2 
 _geom_bond_distance 
 _geom_bond_site_symmetry_2 
 _geom_bond_publ_flag 
C1 C2 1.522(6) . ? 
C1 P1 1.833(4) . ? 
C1 H1A 0.9900 . ? 
C1 H1B 0.9900 . ? 
C2 C3 1.517(6) . ? 
C2 H2A 0.9900 . ? 
C2 H2B 0.9900 . ? 
C3 P2 1.834(4) . ? 
C3 H3A 0.9900 . ? 
C3 H3B 0.9900 . ? 
C4 C5 1.388(6) . ? 
C4 C9 1.389(6) . ? 
C4 P1 1.830(4) . ? 
C5 C6 1.383(6) . ? 
C5 H5 0.9500 . ? 
C6 C7 1.378(6) . ? 
C6 H6 0.9500 . ? 
C7 C8 1.360(7) . ? 
C7 H7 0.9500 . ? 
C8 C9 1.391(6) . ? 
C8 H8 0.9500 . ? 
C9 H9 0.9500 . ? 
C10 C11 1.383(6) . ? 
C10 C15 1.385(6) . ? 
C10 P1 1.820(4) . ? 
C11 C12 1.387(6) . ? 
C11 H11 0.9500 . ? 
C12 C13 1.367(7) . ? 
C12 H12 0.9500 . ? 
C13 C14 1.370(7) . ? 
C13 H13 0.9500 . ? 
C14 C15 1.389(6) . ? 
C14 H14 0.9500 . ? 
C15 H15 0.9500 . ? 
C16 C21 1.371(7) . ? 
C16 C17 1.382(7) . ? 
C16 P2 1.825(5) . ? 
C17 C18 1.376(8) . ? 
C17 H17 0.9500 . ? 
C18 C19 1.364(9) . ? 
C18 H18 0.9500 . ? 
C19 C20 1.374(9) . ? 
C19 H19 0.9500 . ? 
C20 C21 1.395(7) . ? 
C20 H20 0.9500 . ? 
C21 H21 0.9500 . ? 
C22 C23 1.371(6) . ? 
C22 C27 1.387(6) . ? 
C22 P2 1.832(4) . ? 
C23 C24 1.385(6) . ? 
C23 H23 0.9500 . ? 
C24 C25 1.381(7) . ? 
C24 H24 0.9500 . ? 
C25 C26 1.363(7) . ? 
C25 H25 0.9500 . ? 
C26 C27 1.386(6) . ? 
C26 H26 0.9500 . ? 
C27 H27 0.9500 . ? 
C28 C29 1.317(6) . ? 
C28 Si1 1.877(5) . ? 
C28 H28 0.9500 . ? 
C29 C30 1.485(6) . ? 
C29 H29 0.9500 . ? 
C30 C35 1.381(7) . ? 
C30 C31 1.389(6) . ? 
C31 C32 1.373(6) . ? 
C31 H31 0.9500 . ? 
C32 C33 1.374(7) . ? 
C32 H32 0.9500 . ? 
C33 C34 1.374(8) . ? 
C33 H33 0.9500 . ? 
C34 C35 1.390(7) . ? 
C34 H34 0.9500 . ? 
C35 H35 0.9500 . ? 
C36 Si1 1.868(5) . ? 
C36 H36A 0.9800 . ? 
C36 H36B 0.9800 . ? 
C36 H36C 0.9800 . ? 
C37 Si1 1.868(5) . ? 
C37 H37A 0.9800 . ? 
C37 H37B 0.9800 . ? 
C37 H37C 0.9800 . ? 
C38 C39 1.390(6) . ? 
C38 C43 1.407(6) . ? 
C38 Pd1 2.042(4) . ? 
C39 C40 1.400(6) . ? 
C39 H39 0.9500 . ? 
C40 C41 1.373(6) . ? 
C40 H40 0.9500 . ? 
C41 C42 1.378(6) . ? 
C41 H41 0.9500 . ? 
C42 C43 1.384(6) . ? 
C42 H42 0.9500 . ? 
C43 C44 1.504(6) . ? 
C44 H44A 0.9800 . ? 
C44 H44B 0.9800 . ? 
C44 H44C 0.9800 . ? 
O1 Si1 1.577(3) . ? 
O1 Pd1 2.050(3) . ? 
P1 Pd1 2.2179(11) . ? 
P2 Pd1 2.3479(12) . ? 
 
loop_ 
 _geom_angle_atom_site_label_1 
 _geom_angle_atom_site_label_2 
 _geom_angle_atom_site_label_3 
 _geom_angle 
 _geom_angle_site_symmetry_1 
 _geom_angle_site_symmetry_3 
 _geom_angle_publ_flag 
C2 C1 P1 114.9(3) . . ? 
C2 C1 H1A 108.5 . . ? 
P1 C1 H1A 108.5 . . ? 
C2 C1 H1B 108.5 . . ? 
P1 C1 H1B 108.5 . . ? 
H1A C1 H1B 107.5 . . ? 
C3 C2 C1 114.8(4) . . ? 
C3 C2 H2A 108.6 . . ? 
C1 C2 H2A 108.6 . . ? 
C3 C2 H2B 108.6 . . ? 
C1 C2 H2B 108.6 . . ? 
H2A C2 H2B 107.6 . . ? 
C2 C3 P2 115.9(3) . . ? 
C2 C3 H3A 108.3 . . ? 
P2 C3 H3A 108.3 . . ? 
C2 C3 H3B 108.3 . . ? 
P2 C3 H3B 108.3 . . ? 
H3A C3 H3B 107.4 . . ? 
C5 C4 C9 118.6(4) . . ? 
C5 C4 P1 120.1(4) . . ? 
C9 C4 P1 121.2(3) . . ? 
C6 C5 C4 121.2(5) . . ? 
C6 C5 H5 119.4 . . ? 
C4 C5 H5 119.4 . . ? 
C7 C6 C5 119.5(5) . . ? 
C7 C6 H6 120.3 . . ? 
C5 C6 H6 120.3 . . ? 
C8 C7 C6 120.0(5) . . ? 
C8 C7 H7 120.0 . . ? 
C6 C7 H7 120.0 . . ? 
C7 C8 C9 121.2(5) . . ? 
C7 C8 H8 119.4 . . ? 
C9 C8 H8 119.4 . . ? 
C4 C9 C8 119.5(5) . . ? 
C4 C9 H9 120.2 . . ? 
C8 C9 H9 120.2 . . ? 
C11 C10 C15 117.8(4) . . ? 
C11 C10 P1 122.8(4) . . ? 
C15 C10 P1 118.9(4) . . ? 
C10 C11 C12 120.8(5) . . ? 
C10 C11 H11 119.6 . . ? 
C12 C11 H11 119.6 . . ? 
C13 C12 C11 120.7(5) . . ? 
C13 C12 H12 119.7 . . ? 
C11 C12 H12 119.7 . . ? 
C12 C13 C14 119.4(5) . . ? 
C12 C13 H13 120.3 . . ? 
C14 C13 H13 120.3 . . ? 
C13 C14 C15 120.2(5) . . ? 
C13 C14 H14 119.9 . . ? 
C15 C14 H14 119.9 . . ? 
C10 C15 C14 121.1(5) . . ? 
C10 C15 H15 119.4 . . ? 
C14 C15 H15 119.4 . . ? 
C21 C16 C17 119.4(5) . . ? 
C21 C16 P2 119.8(4) . . ? 
C17 C16 P2 120.7(4) . . ? 
C18 C17 C16 120.3(6) . . ? 
C18 C17 H17 119.9 . . ? 
C16 C17 H17 119.9 . . ? 
C19 C18 C17 120.4(7) . . ? 
C19 C18 H18 119.8 . . ? 
C17 C18 H18 119.8 . . ? 
C18 C19 C20 120.2(6) . . ? 
C18 C19 H19 119.9 . . ? 
C20 C19 H19 119.9 . . ? 
C19 C20 C21 119.6(7) . . ? 
C19 C20 H20 120.2 . . ? 
C21 C20 H20 120.2 . . ? 
C16 C21 C20 120.2(6) . . ? 
C16 C21 H21 119.9 . . ? 
C20 C21 H21 119.9 . . ? 
C23 C22 C27 118.4(4) . . ? 
C23 C22 P2 120.0(4) . . ? 
C27 C22 P2 121.5(4) . . ? 
C22 C23 C24 120.7(5) . . ? 
C22 C23 H23 119.6 . . ? 
C24 C23 H23 119.6 . . ? 
C25 C24 C23 120.1(5) . . ? 
C25 C24 H24 120.0 . . ? 
C23 C24 H24 120.0 . . ? 
C26 C25 C24 119.9(5) . . ? 
C26 C25 H25 120.1 . . ? 
C24 C25 H25 120.1 . . ? 
C25 C26 C27 119.8(5) . . ? 
C25 C26 H26 120.1 . . ? 
C27 C26 H26 120.1 . . ? 
C26 C27 C22 121.0(5) . . ? 
C26 C27 H27 119.5 . . ? 
C22 C27 H27 119.5 . . ? 
C29 C28 Si1 125.3(4) . . ? 
C29 C28 H28 117.4 . . ? 
Si1 C28 H28 117.4 . . ? 
C28 C29 C30 127.9(5) . . ? 
C28 C29 H29 116.0 . . ? 
C30 C29 H29 116.0 . . ? 
C35 C30 C31 118.1(5) . . ? 
C35 C30 C29 118.9(5) . . ? 
C31 C30 C29 122.9(5) . . ? 
C32 C31 C30 121.1(5) . . ? 
C32 C31 H31 119.5 . . ? 
C30 C31 H31 119.5 . . ? 
C31 C32 C33 120.7(5) . . ? 
C31 C32 H32 119.7 . . ? 
C33 C32 H32 119.7 . . ? 
C32 C33 C34 119.0(5) . . ? 
C32 C33 H33 120.5 . . ? 
C34 C33 H33 120.5 . . ? 
C33 C34 C35 120.7(5) . . ? 
C33 C34 H34 119.6 . . ? 
C35 C34 H34 119.6 . . ? 
C30 C35 C34 120.4(5) . . ? 
C30 C35 H35 119.8 . . ? 
C34 C35 H35 119.8 . . ? 
Si1 C36 H36A 109.5 . . ? 
Si1 C36 H36B 109.5 . . ? 
H36A C36 H36B 109.5 . . ? 
Si1 C36 H36C 109.5 . . ? 
H36A C36 H36C 109.5 . . ? 
H36B C36 H36C 109.5 . . ? 
Si1 C37 H37A 109.5 . . ? 
Si1 C37 H37B 109.5 . . ? 
H37A C37 H37B 109.5 . . ? 
Si1 C37 H37C 109.5 . . ? 
H37A C37 H37C 109.5 . . ? 
H37B C37 H37C 109.5 . . ? 
C39 C38 C43 118.1(4) . . ? 
C39 C38 Pd1 121.6(3) . . ? 
C43 C38 Pd1 120.3(3) . . ? 
C38 C39 C40 122.1(4) . . ? 
C38 C39 H39 118.9 . . ? 
C40 C39 H39 118.9 . . ? 
C41 C40 C39 118.8(4) . . ? 
C41 C40 H40 120.6 . . ? 
C39 C40 H40 120.6 . . ? 
C40 C41 C42 119.9(4) . . ? 
C40 C41 H41 120.1 . . ? 
C42 C41 H41 120.1 . . ? 
C41 C42 C43 122.1(4) . . ? 
C41 C42 H42 118.9 . . ? 
C43 C42 H42 118.9 . . ? 
C42 C43 C38 119.0(4) . . ? 
C42 C43 C44 120.7(4) . . ? 
C38 C43 C44 120.3(4) . . ? 
C43 C44 H44A 109.5 . . ? 
C43 C44 H44B 109.5 . . ? 
H44A C44 H44B 109.5 . . ? 
C43 C44 H44C 109.5 . . ? 
H44A C44 H44C 109.5 . . ? 
H44B C44 H44C 109.5 . . ? 
Si1 O1 Pd1 142.16(18) . . ? 
C10 P1 C4 106.1(2) . . ? 
C10 P1 C1 100.9(2) . . ? 
C4 P1 C1 102.2(2) . . ? 
C10 P1 Pd1 111.56(15) . . ? 
C4 P1 Pd1 117.72(13) . . ? 
C1 P1 Pd1 116.54(15) . . ? 
C16 P2 C22 102.7(2) . . ? 
C16 P2 C3 102.9(2) . . ? 
C22 P2 C3 103.9(2) . . ? 
C16 P2 Pd1 116.05(17) . . ? 
C22 P2 Pd1 110.60(14) . . ? 
C3 P2 Pd1 118.82(15) . . ? 
C38 Pd1 O1 91.02(14) . . ? 
C38 Pd1 P1 85.97(12) . . ? 
O1 Pd1 P1 176.99(9) . . ? 
C38 Pd1 P2 176.74(12) . . ? 
O1 Pd1 P2 87.15(9) . . ? 
P1 Pd1 P2 95.86(4) . . ? 
O1 Si1 C36 109.6(2) . . ? 
O1 Si1 C37 115.0(2) . . ? 
C36 Si1 C37 107.1(2) . . ? 
O1 Si1 C28 113.8(2) . . ? 
C36 Si1 C28 105.6(2) . . ? 
C37 Si1 C28 105.1(2) . . ? 
 
_diffrn_measured_fraction_theta_max    0.997 
_diffrn_reflns_theta_full              25.71 
_diffrn_measured_fraction_theta_full   0.997 
_refine_diff_density_max    0.461 
_refine_diff_density_min   -0.419 
_refine_diff_density_rms    0.093 
_publ_requested_category         FM 
 
_publ_section_references 
; 
Bruker (2001). SAINT, SHELXTL, SMART, XCIF.  Bruker AXS, Inc., 
Madison, Wisconsin, USA. 
 
Bruker (2004). APEX2. Bruker AXS, Inc., Madison, Wisconsin, USA. 
 
; 
 
_publ_section_figure_captions 
; 
Figure 1.  SHELXTL (Bruker, 2001) plot showing 35% probability ellipsoids 
for non-H atoms and circles of arbitrary size for H atoms. 
; 
 
_publ_section_exptl_prep 
; 
Crystals were grown by liquid diffusion of hexane into a benzene solution. 
; 
 
_publ_section_exptl_refinement 
; 
Methyl H atom positions, R-CH~3~, were optimized by rotation about R-C 
bonds with idealized C-H, R--H and H--H distances.  Remaining H atoms were 
included as riding idealized contributors.  Methyl H atom U's were assigned 
as 1.5 times U~eq~ of the carrier atom; remaining H atom U's were assigned 
as 1.2 times carrier U~eq~. 
; 
 
_publ_contact_author 
; 
Prof. Scott E. Denmark 
School of Chemical Sciences 
245 Roger Adams Laboratory
University of Illinois 
600 South Mathews Avenue 
Urbana, Illinois  61801 
USA 
; 
_publ_contact_author_phone        '1  217 333 0066' 
_publ_contact_author_fax          '1  217 333 3984' 
_publ_contact_author_email        denmark@scs.uiuc.edu 
_publ_contact_letter 
; 
; 
Please consider this CIF submission for publication as a structural paper 
in Acta Crystallographica E. 
; 
_publ_requested_journal           'J. Am. Chem. Soc. 
_publ_requested_coeditor_name     ? 
 
_publ_section_title 
; 
 ? 
; 
 
_publ_section_abstract 
; 
 ? 
; 
 
_publ_section_comment 
; 
 ? 
; 
 
_publ_section_acknowledgements 
; 
The Materials Chemistry Laboratory at the University of Illinois was 
supported in part by grants NSF CHE 95-03145 and NSF CHE 03-43032 
from the National Science Foundation. 
; 
 
loop_ 
 _publ_author_name 
 _publ_author_address 
'Denmark, Scott E.' 
; 
Department of Chemistry 
University of Illinois 
600 South Mathews Avenue 
Urbana, Illinois  61801 
USA
; 
'Tymonko, Steven A.' 
; 
Department of Chemistry 
University of Illinois 
600 South Mathews Avenue 
Urbana, Illinois  61801 
USA 
;  
'Ober, Michael H.'
;
Department of Chemistry 
University of Illinois 
600 South Mathews Avenue 
Urbana, Illinois  61801 
USA 
;
'Wilson, Scott R.' 
; 
University of Illinois 
School of Chemical Sciences, Box 59-1 
505 South Mathews Avenue 
Urbana, Illinois  61801 
USA 
; 
'Prussak-Wieckowska, Teresa' 
; 
University of Illinois 
School of Chemical Sciences, Box 59-1 
505 South Mathews Avenue 
Urbana, Illinois  61801 
USA 
; 
'Gao, Yi-Gui' 
; 
University of Illinois 
School of Chemical Sciences, Box 59-1 
505 South Mathews Avenue 
Urbana, Illinois  61801 
USA 
; 
'Ramesh, Maya' 
; 
University of Illinois 
School of Chemical Sciences, Box 59-1 
505 South Mathews Avenue 
Urbana, Illinois  61801 
USA 
; 
 
loop_ 
 _exptl_crystal_face_index_h 
 _exptl_crystal_face_index_k 
 _exptl_crystal_face_index_l 
 _exptl_crystal_face_perp_dist 
    0.00   -1.00    0.00    0.0300 
    0.00    1.00    0.00    0.0300 
    2.00    0.00   -1.00    0.1500 
   -2.00    0.00    1.00    0.1500 
    0.00    0.00    1.00    0.0100 
    0.00    0.00   -1.00    0.0100 

;
